# Supplementary material
Source: PubMed Central journal article supplement (PMC7106504)
Supplement: mmc1.pdf [file mmc1.pdf]

## Electronic Supplementary Material

### Suspected CAP patients, admitted in the influenza season

|                                                              | Not tested<br>(n=227) | Tested<br>(n=190)   | p value |
|--------------------------------------------------------------|-----------------------|---------------------|---------|
| Age, median years (Q1, Q3)                                   | 62.0 (48.0, 71.0)     | 62.5 (49.0, 73.0)   | 0.21    |
| Male, n (%)                                                  | 162 (71%)             | 105 (55%)           | <.001   |
| BMI, median (Q1, Q3)                                         | 24.8 (22.2, 27.8)     | 24.7 (22.0, 29.2)   | 0.65    |
| Medical admission, n (%)                                     | 189 (83%)             | 188 (99%)           | <.001   |
| Hospital days prior to ICU admission, median (Q1, Q3)        | 0.0 (0.0, 1.0)        | 0.0 (0.0, 0.0)      | 0.54    |
| Comorbidities                                                |                       |                     |         |
| COPD, n (%)                                                  | 32 (14%)              | 53 (28%)            | <.001   |
| Congestive heart failure, n (%)                              | 13 (6%)               | 12 (6%)             | 0.80    |
| Diabetes mellitus, n (%)                                     | 43 (19%)              | 43 (23%)            | 0.35    |
| Chronic renal insufficiency, n (%)                           | 17 (7%)               | 21 (11%)            | 0.21    |
| Malignancy, n (%)                                            | 22 (10%)              | 15 (8%)             | 0.52    |
| Splenectomy, n (%)                                           | 1 (0%)                | 0 (0%)              | 0.36    |
| Immune deficiency, n (%) <sup>a</sup>                        | 21 (9%)               | 52 (27%)            | <.001   |
| APACHE IV Score, median (Q1, Q3)                             | 79.0 (60.0, 105.0)    | 77.0 (60.0, 97.0)   | 0.61    |
| Acute Physiology Score, median (Q1, Q3)                      | 65.0 (49.0, 95.0)     | 63.0 (48.0, 80.0)   | 0.11    |
| SOFA score on admission, median (Q1, Q3)                     | 7.0 (5.0, 9.0)        | 8.0 (5.0, 10.0)     | 0.19    |
| In the first 24 hours of admission                           |                       |                     |         |
| Highest central body temperature, median °C (Q1, Q3)         | 37.7 (36.9, 38.4)     | 37.8 (37.1, 38.7)   | 0.025   |
| First measured CRP, median mg/L (Q1, Q3)                     | 47.0 (6.0, 185.0)     | 163.0 (50.0, 249.0) | <.001   |
| Highest leucocytes, median cells·10 <sup>9</sup> /L (Q1, Q3) | 14.9 (10.5, 19.0)     | 11.5 (6.5, 16.4)    | <.001   |
| Leucopenia, n (%) <sup>b</sup>                               | 22 (10%)              | 40 (21%)            | 0.001   |
| Use of vasoactive medication > 1h, n (%)                     | 139 (61%)             | 118 (62%)           | 0.86    |
| Acute renal failure, n (%)                                   | 20 (9%)               | 33 (17%)            | 0.009   |
| Highest serum lactate, median mmol/L (Q1, Q3)                | 2.6 (1.7, 4.5)        | 2.2 (1.5, 3.4)      | 0.007   |

**Supplementary Table S1.** Baseline variables of a subgroup of patients admitted with a suspected CAP in the influenza season, comparing patients tested for respiratory viruses versus patients that were not tested. Influenza season was defined from November 1<sup>st</sup> to April 30<sup>th</sup>

Abbreviations: APACHE IV = Acute Physiology and Chronic Health Evaluation IV; BMI = body mass index; CAP = community-acquired pneumonia; COPD = chronic obstructive pulmonary disease; CRP = C-reactive protein; HAP = hospital-acquired pneumonia; ICU = intensive care unit; SOFA = sequential organ failure assessment.

<sup>a</sup> Immunodeficiency was defined as a history of solid organ or stem cell transplantation, infection with the human immunodeficiency virus, hematological malignancy, use of immunosuppressive medication (prednisone >0.1 mg/kg for >3 months, prednisone >75 mg/day for >1 week, or equivalent), chemotherapy/radiotherapy in the year before ICU admission, and any known humoral or cellular immune deficiency.

<sup>b</sup> Leucopenia was defined as <4·10<sup>9</sup>/L leucocytes
